# Supplementary material for: Transcriptomic, Proteomic, and Genomic Mutational Fraction Differences Based on HPV Status Observed in Patient-Derived Xenograft Models of Penile Squamous Cell Carcinoma
Source: MDPI journal article supplement (doi:10.3390/cancers16051066), 2024-03-06
Supplement: s1 [file s1]

# Raw Blots

Supplemental material for reviewers

All MW numbers are given in kDa

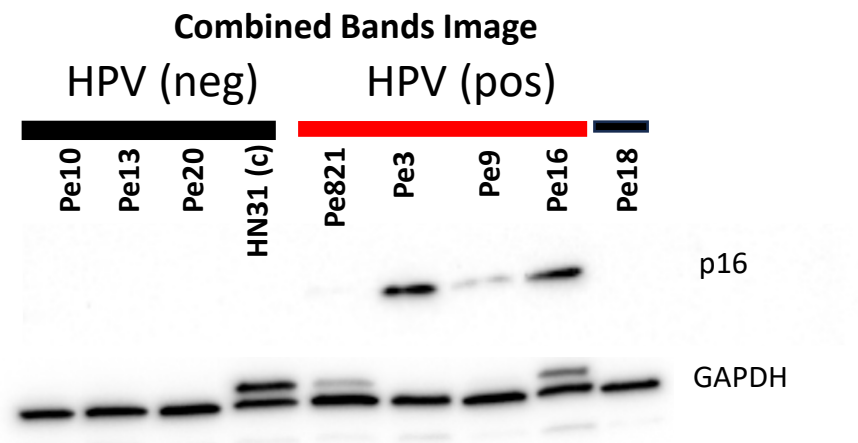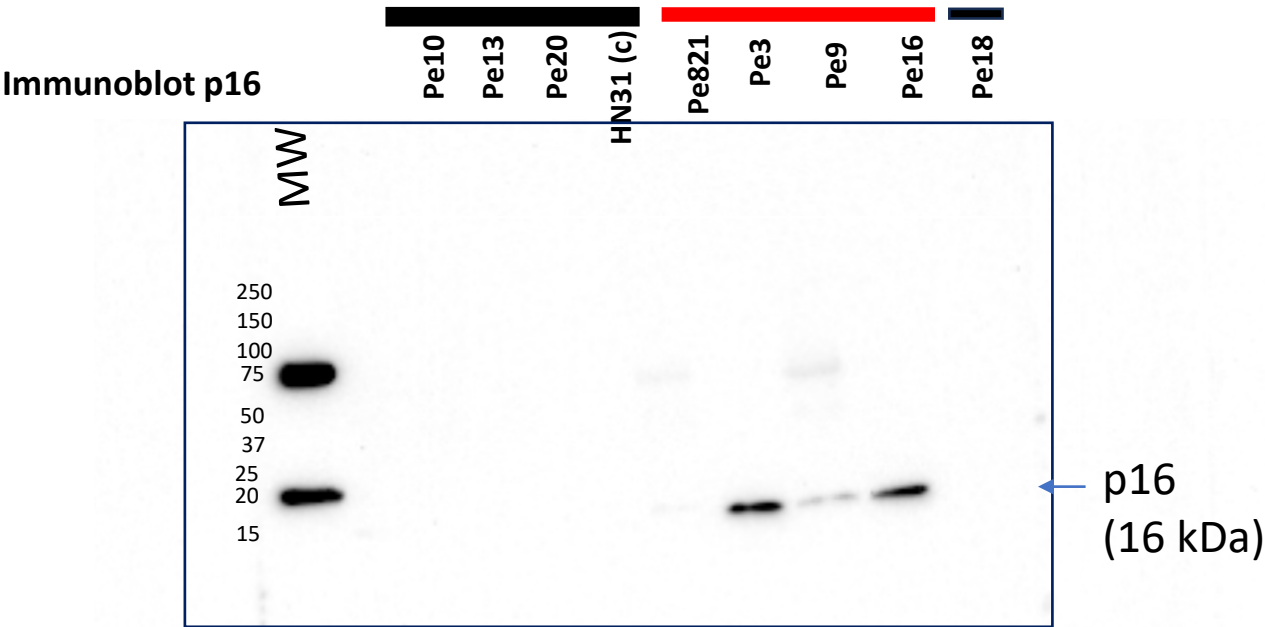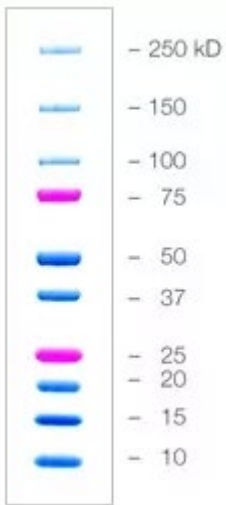

MW ladder  
used in all blots

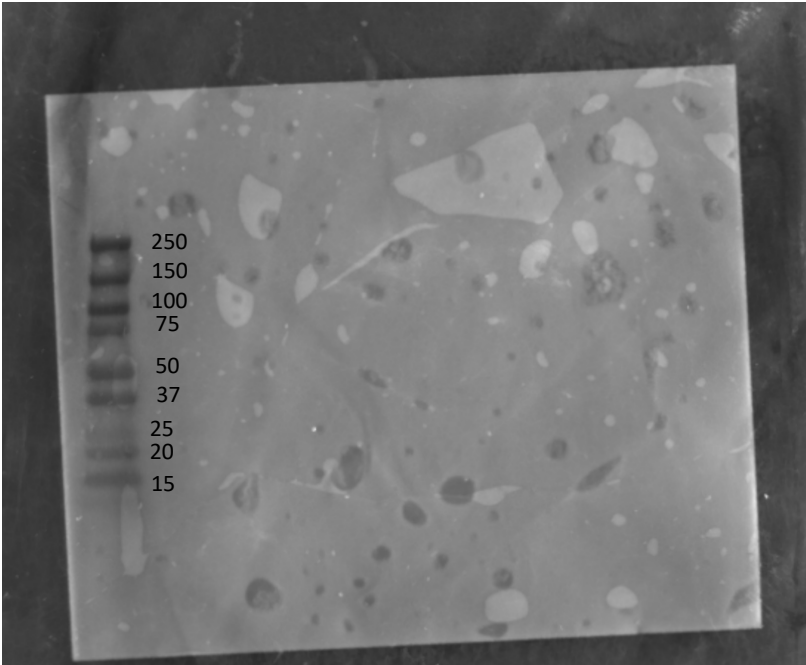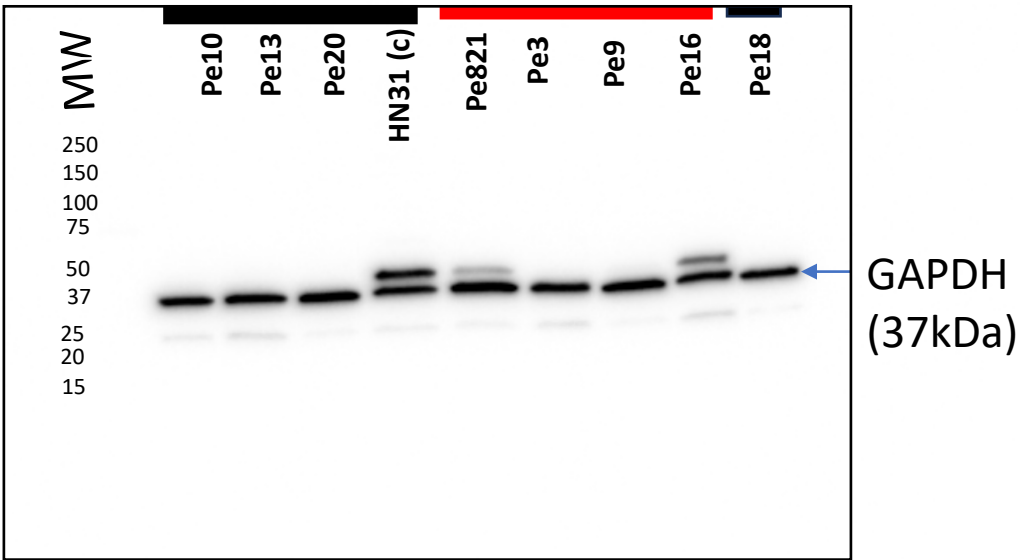

Immunoblot GAPDH

All MW numbers are given in kDa

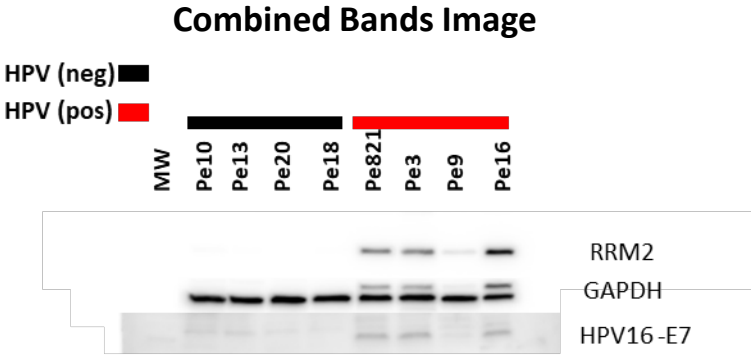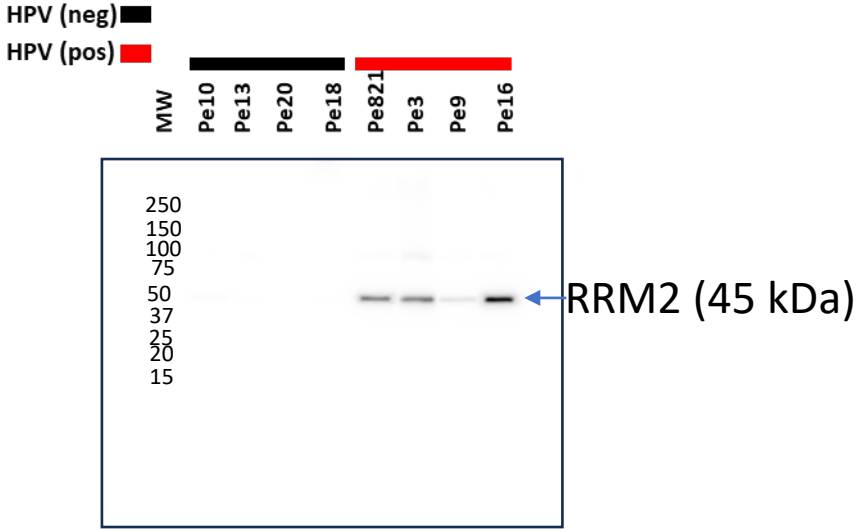

Immunoblot RRM2

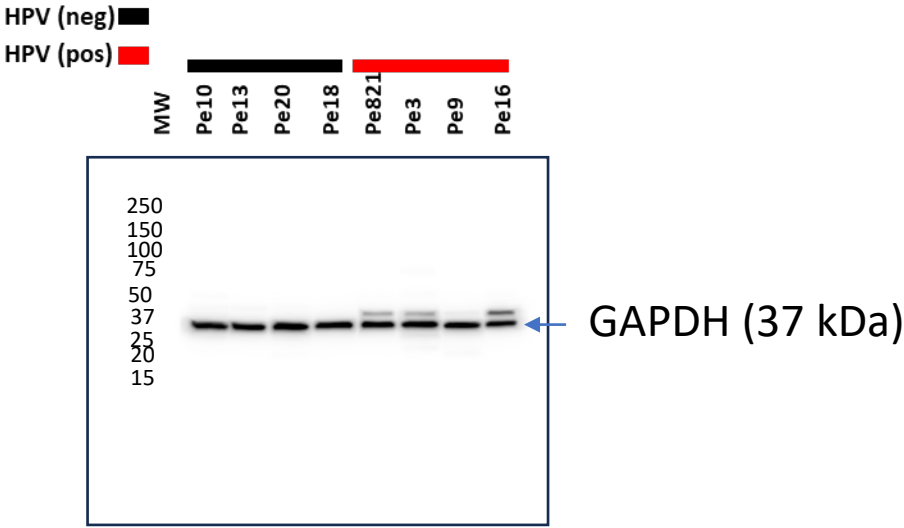

Immunoblot GAPDH

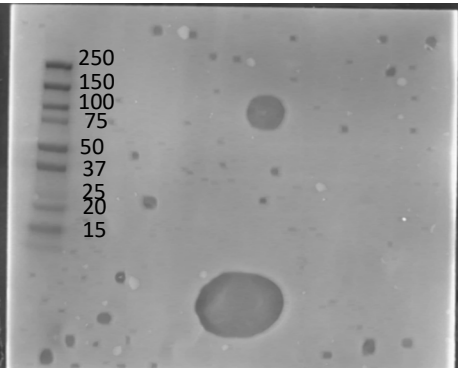

Bright field Image

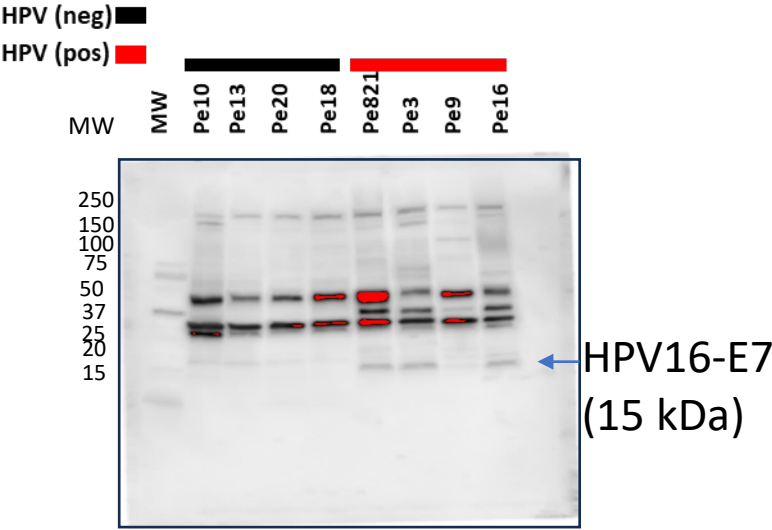

Immunoblot HPV16-E7

All MW numbers are given in kDa

HPV (neg) ■

HPV (pos) ■

Combined Bands Image

Pe10 Pe13 MW Pe18 Pe20 Pe821 Pe3 Pe9 Pe16

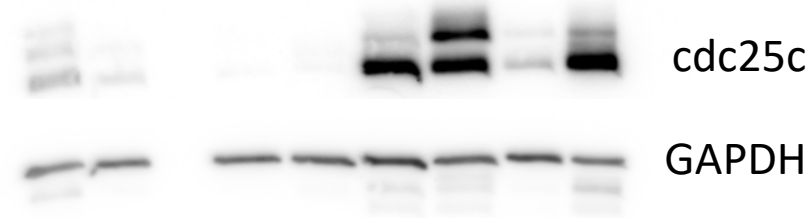

Pe10 Pe13 MW Pe18 Pe20 Pe821 Pe3 Pe9 Pe16

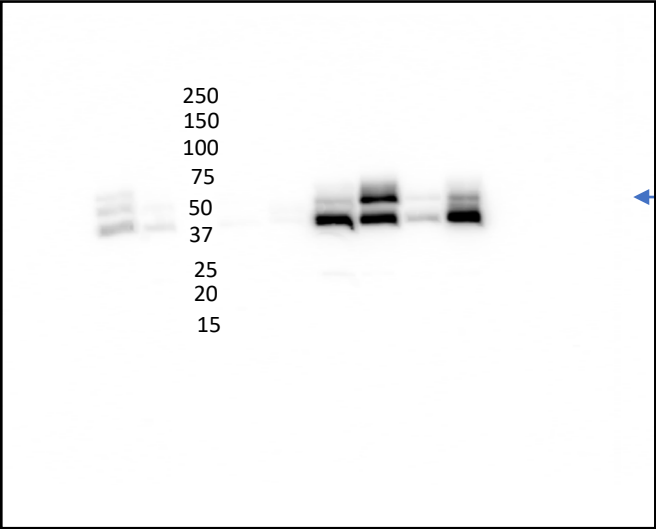

Immunoblot CDC25C

Bright field Image

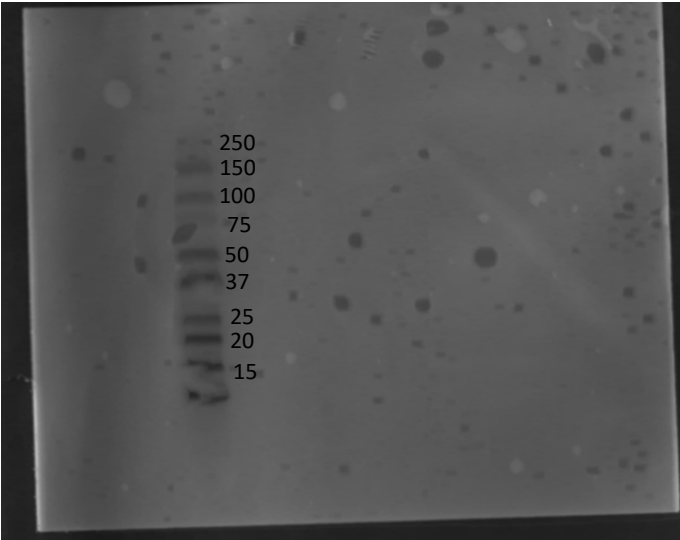

Pe10 Pe13 MW Pe18 Pe20 Pe821 Pe3 Pe9 Pe16

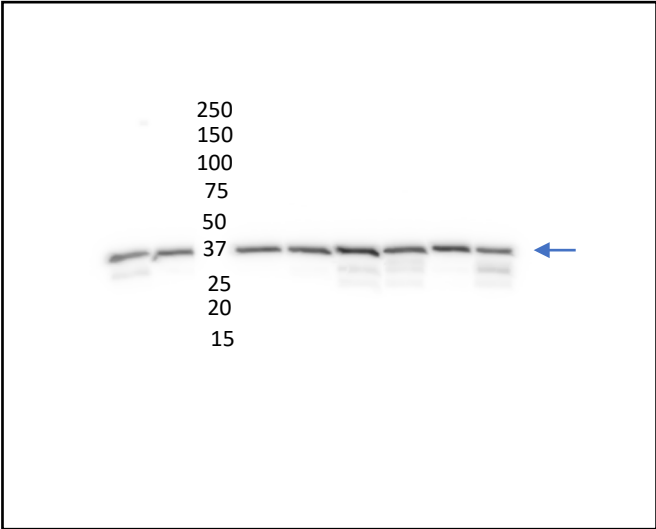

Immunoblot GAPDH
